# Supplementary material for: Characterization of heterozygous ATTR Tyr114Cys amyloidosis-specific induced pluripotent stem cells
Source: PubMed Central journal article supplement — Heliyon. 2024 Jan 17;10(2):e24590. doi: 10.1016/j.heliyon.2024.e24590 (PMC10835262; doi:10.1016/j.heliyon.2024.e24590), 2024-01-17

# Supplemental Figure 1

(A)

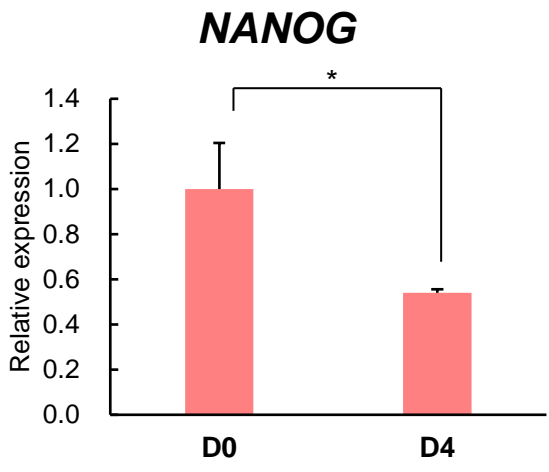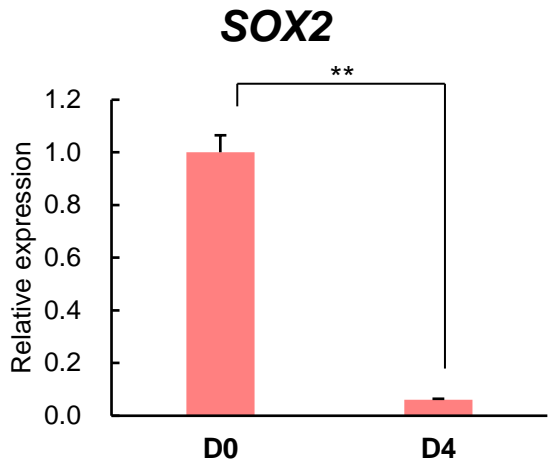

(B)

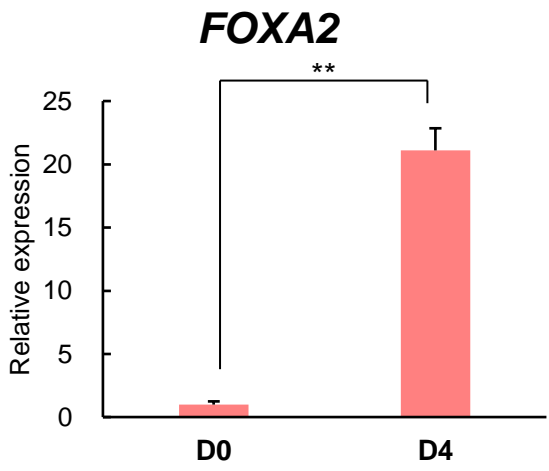

# Supplemental Figure 2

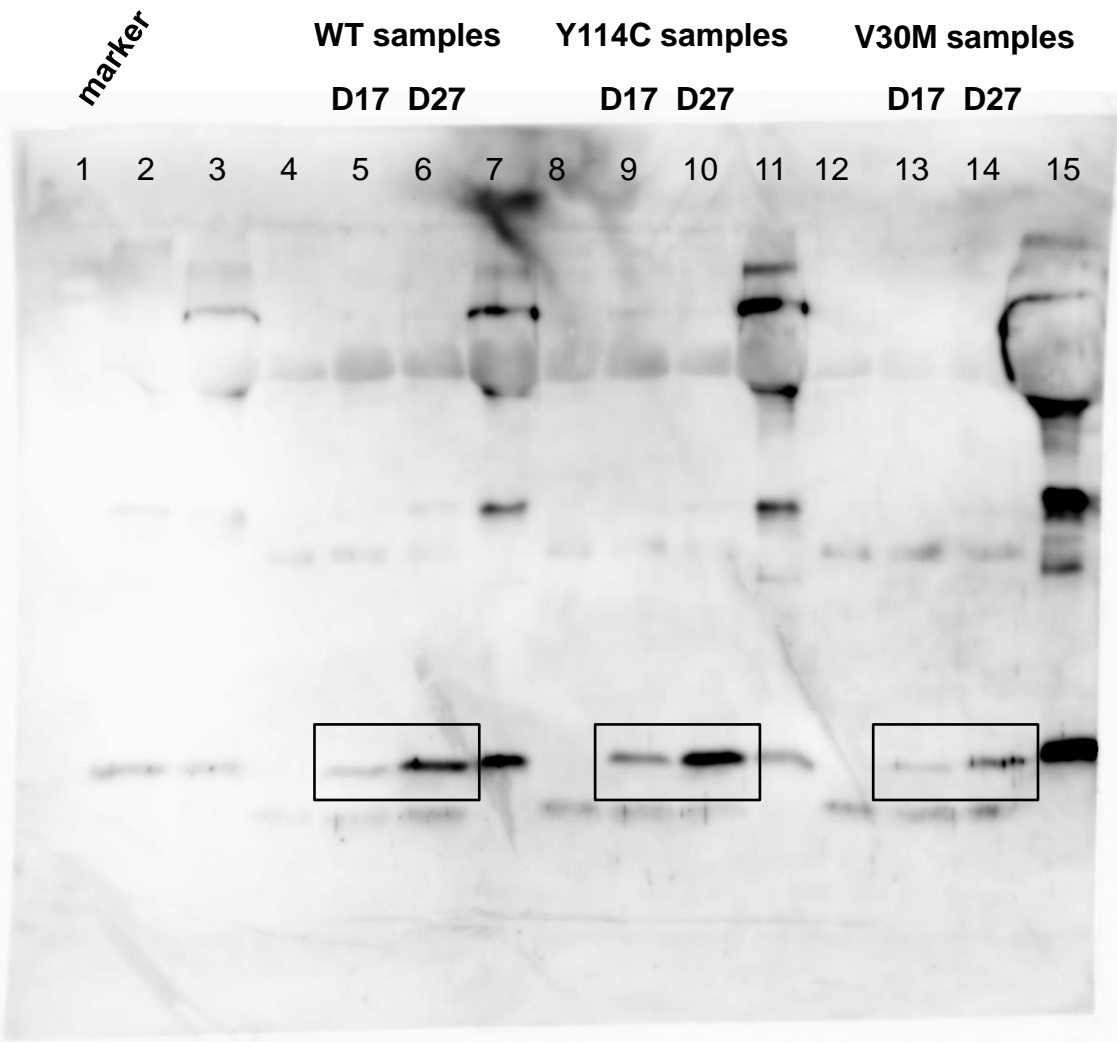

Capture: ImageQuant Las4000mini

# Supplemental Figure 3

(A)

104 114 127  
 R Y T I A A L L S P Y S Y S T T A V V T N P K E

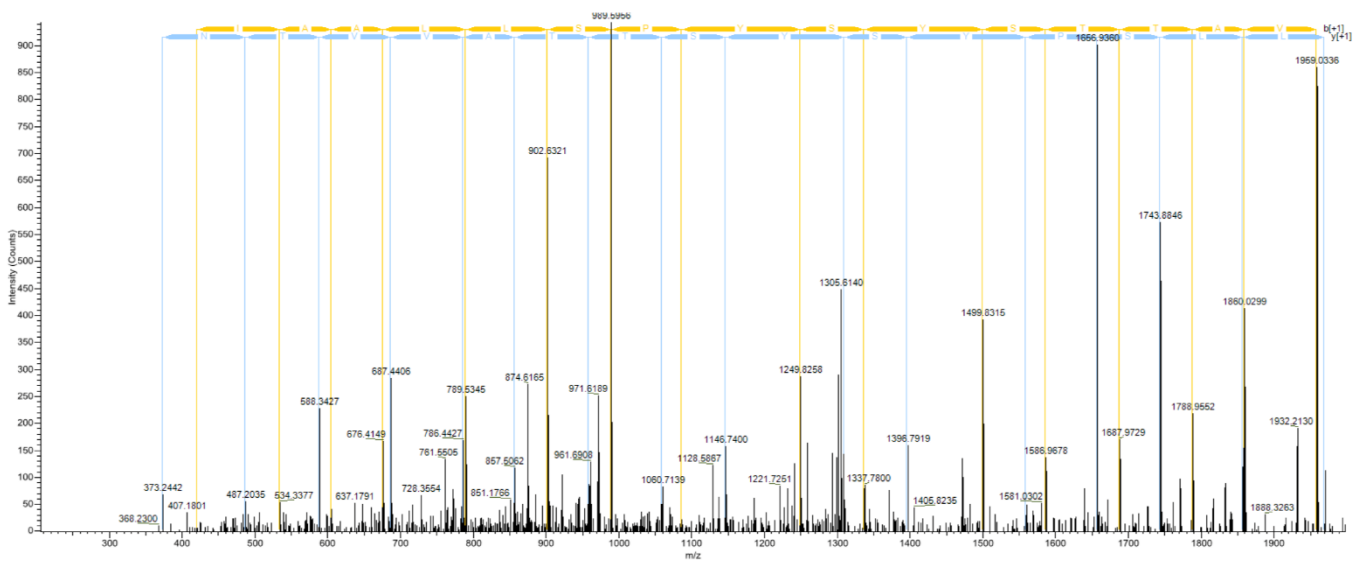

(B)

R Y T I A A L L S P **c** S Y S T T A V V T N P K E

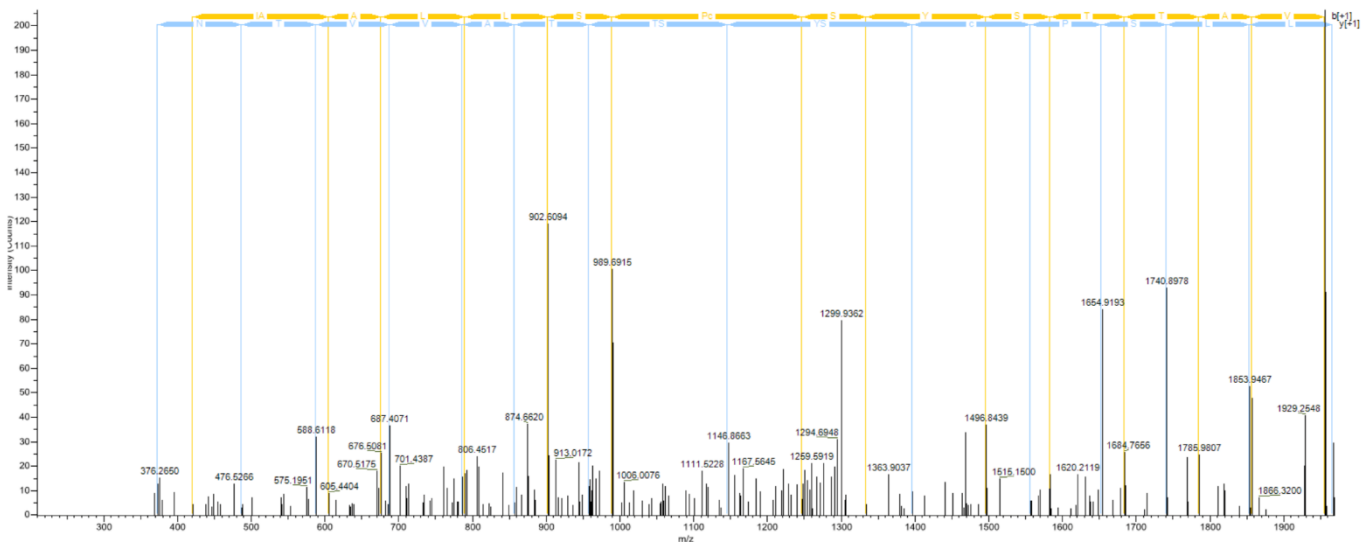

Supplement: mmc1.pdf [file mmc1.pdf]
