# Supplementary material for: Characterization of heterozygous ATTR Tyr114Cys amyloidosis-specific induced pluripotent stem cells
Source: PubMed Central journal article supplement — Heliyon. 2024 Jan 17;10(2):e24590. doi: 10.1016/j.heliyon.2024.e24590 (PMC10835262; doi:10.1016/j.heliyon.2024.e24590), 2024-01-17
Supplement: mmc2.pdf [file mmc2.pdf]

### Supplemental Table 1.

#### LC-MS/MS analysis for HLCs differentiated from WT iPS cells.

| <b>WT TTR peptides</b>            | <b>number of peptides</b> | <b>MH+ [Da]</b> |
|-----------------------------------|---------------------------|-----------------|
| RYTIAALLSP <u>Y</u> SYSTTAVVTNPKE | 10                        | 2646.38237      |
| YTIAALLSP <u>Y</u> SYSTTAVVTNPKE  | 7                         | 2491.12578      |
| VLDVAVRGSPAINVA <u>V</u> HVFR     | 4                         | 2020.70798      |
| GSPAINVA <u>V</u> HVFR            | 5                         | 1366.82610      |

LC-MS/MS analysis showed the D27 culture supernatant of HLCs differentiated from WT iPS cells. The RYTIAALLSPYYSYSTTAVVTNPKE, YTIAALLSPYYSYSTTAVVTNPKE, VLDVAVRGSPAINVAVHVFR and GSPAINVAVMHVFR mean 104-127, 105-127, 16-34 and 22-34 amino acids of TTR respectively. M + proton (H<sup>+</sup>; MH<sup>+</sup>) means the peptides operated in positive ion mode.

### Supplemental Table 2.

#### LC-MS/MS analysis for HLCs differentiated from V30M iPS cells.

| <b>WT TTR peptides</b>                 | <b>number of peptides</b> | <b>MH+ [Da]</b> |
|----------------------------------------|---------------------------|-----------------|
| VLDVAVRGSPAINVA <u>V</u> HVFR          | 1                         | 2019.18125      |
| GSPAINVA <u>V</u> HVFR                 | 2                         | 1367.38677      |
| <b>ATTR V30M peptides</b>              | <b>number of peptides</b> | <b>MH+ [Da]</b> |
| VLDVAVRGSPAINVA <u>V</u> <b>M</b> HVFR | 1                         | 2051.98551      |
| GSPAINVA <u>V</u> <b>M</b> HVFR        | 3                         | 1399.00945      |

LC-MS/MS analysis showed the D27 culture supernatant of HLCs differentiated from V30M iPS cells. The VLDVAVRGSPAINVA V/**M** HVFR and GSPAINVA V/**M** HVFR mean 16-34 and 22-34 amino acids of TTR respectively. M + proton (H<sup>+</sup>; MH<sup>+</sup>) means the peptides operated in positive ion mode.
